# Supplementary material for: Binary adsorption isotherms of two ionic liquids and ibuprofen on an activated carbon cloth: simulation and interpretations using statistical and COSMO-RS models
Source: Royal Society of Chemistry journal article supplement (doi:10.1039/c6ra03405e), 2016-01-01
Supplement: c6ra03405e1.pdf [file c6ra03405e1.pdf]

### Supplementary Informations

The initial molar fraction and molar fraction at equilibrium in solution for the binary mixture of the adsorbates at T=298 K and r=1, for the three studied systems, have been calculated (in Table 1) from the experimental isotherms. The experimental isotherms at T=298 K and r=1 are represented in Figures 3, 4 and 5 in the manuscript for the three binary systems.

**Table 1:**Initial molar fraction and molar fraction at equilibrium in solution for the binary mixture of the adsorbates.

| Binary system | Initial molar fraction of the compound from experience |         |         | Molar fraction in mixture after adsorption from experimental isotherms |         |         |
|---------------|--------------------------------------------------------|---------|---------|------------------------------------------------------------------------|---------|---------|
|               | IL1/IL2                                                | IL1/IBP | IL2/IBP | IL1/IL2                                                                | IL1/IBP | IL2/IBP |
| IL1 compound  | 0.225                                                  | 0.248   | -       | 0.501                                                                  | 0.957   | -       |
| IL2 compound  | 0.225                                                  | -       | 0.220   | 0.498                                                                  | -       | 0.982   |
| IBP compound  | -                                                      | 0.248   | 0.220   | -                                                                      | 0.042   | 0.018   |

The initial molar fractions used for the COSMO-RS calculations are reported in Table 2. Based on the calculated partial pressure (values of partial pressure are retrieved from COSMO-RS output file), all the estimated molar fractions in mixture were also calculated. The values are reported in the Table 2.

**Table 2:** Initial molar fraction and molar fraction derived from calculated partial pressure for the binary mixture of the adsorbates.

| Binary system | Initial molar fraction given for the COSMO-RS calculation |         |         | Molar fraction in mixture obtained from the partial pressures given by COSMO-RS calculations |         |         |
|---------------|-----------------------------------------------------------|---------|---------|----------------------------------------------------------------------------------------------|---------|---------|
|               | IL1/IL2                                                   | IL1/IBP | IL2/IBP | IL1/IL2                                                                                      | IL1/IBP | IL2/IBP |
| IL1 compound  | 0.227                                                     | 0.227   | -       | 0.999                                                                                        | 0.999   | -       |
| IL2 compound  | 0.227                                                     | -       | 0.227   | 0                                                                                            | -       | 0.045   |
| IBP compound  | -                                                         | 0.227   | 0.227   | -                                                                                            | 0       | 0.954   |

The comparison of Table 1 and Table 2 shows obviously a disagreement between the molar fraction in mixture determined from experience and from the COSMO-RS calculation by using the calculated partial pressures in the mixture. This is because the model cannot reproduced the adsorption as it does not take into account a mobility of the adsorbates for interacting with graphene.

So, based on the chemical potentials calculated in the mixture from the COSMO-RS model, the fugacities have been deduced (Table 3) from the following equation:  $\mu_i - RT \ln(P_i) = RT \ln(f_i/P_i)$ , where  $\mu_i$  is the chemical potential in the real mixture of the  $i^{\text{th}}$  component,  $P_i$  is the partial pressure of the  $i^{\text{th}}$  component in the ideal mixture,  $f_i$  is fugacity of the  $i^{\text{th}}$  component,  $T$  is the temperature and  $R$  the perfect gas constant.

**Table 3** : Given initial molar fractions and calculated fugacities determined from the COSMO-RS model.

| Binary system | Initial molar fraction given for the calculation |         |         | Fugacity of the compound calculated from the COSMO-RS model (bar) |                       |                       |
|---------------|--------------------------------------------------|---------|---------|-------------------------------------------------------------------|-----------------------|-----------------------|
|               | IL1/IL2                                          | IL1/IBP | IL2/IBP | IL1/IL2                                                           | IL1/IBP               | IL2/IBP               |
| IL1 compound  | 0.227                                            | 0.227   | -       | 0                                                                 | 0                     | -                     |
| IL2 compound  | 0.227                                            | -       | 0.227   | $0.2 \times 10^{-3}$                                              | -                     | $0.09 \times 10^{-3}$ |
| IBP compound  | -                                                | 0.227   | 0.277   | -                                                                 | $0.03 \times 10^{-3}$ | $0.14 \times 10^{-3}$ |

Regarding the fugacity calculation, we can conclude that:

- for the IL2/IL1 system, Fugacity (IL2) >> Fugacity (IL1)
- for the IL1/IBP system, Fugacity (IBP) >> Fugacity (IL1)
- for the IL2/IBP system, Fugacity (IBP) > Fugacity (IL2).

Regarding now the adsorption isotherms at  $T=298$  K and  $r=1$  (and experimental molar fractions in Table 1), we noticed the results of the calculated fugacities are in good agreement with the adsorbed quantities on the activated carbon for IL2/IBP and IL1/IBP systems. Indeed for the IL1/IBP system:  $Q(\text{IBP}) > Q(\text{IL1})$ , and for the IL2/IBP system:  $Q(\text{IBP}) > Q(\text{IL2})$ .

But for the IL2/IL1 system, the fugacities values of IL1 and IL2 are not in agreement with the adsorption uptake as  $Q(\text{IL2}) \sim Q(\text{IL1})$  (the adsorption uptakes of IL1 and IL2 are very close).

The conclusion is that the values of the fugacities calculated from the COSMO-RS model in the mixture, are not exactly in agreement with adsorption uptake on the carbon surface. This is because the COSMO-RS model does not allow simulating the adsorption phenomenon.
